# Supplementary material for: Role of MicroRNAs 99b, 181a, and 181b in the Differentiation of Human Embryonic Stem Cells to Vascular Endothelial Cells
Source: PubMed Central journal article supplement (PMC3490385; doi:10.1002/stem.1026), 2012-01-09

SA461

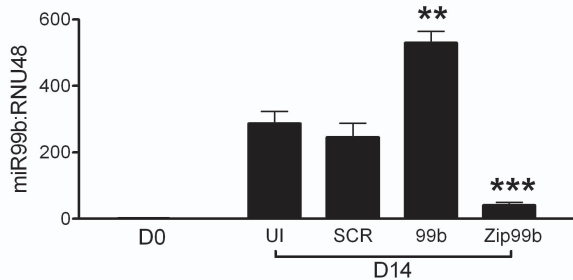

H1

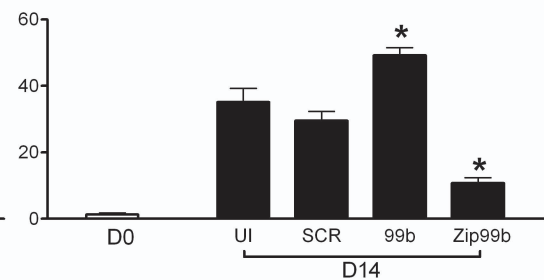

miR modulation

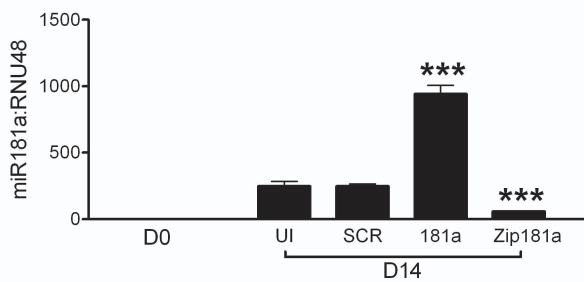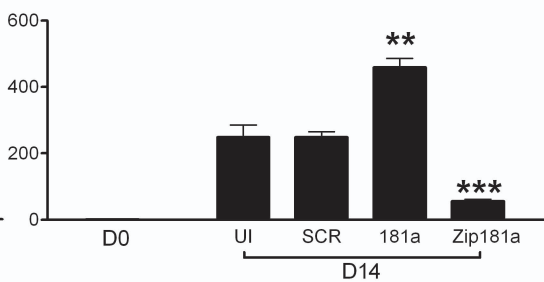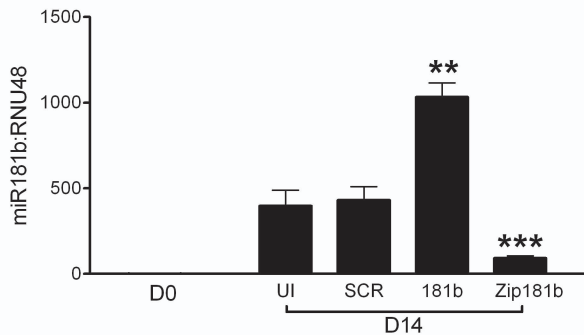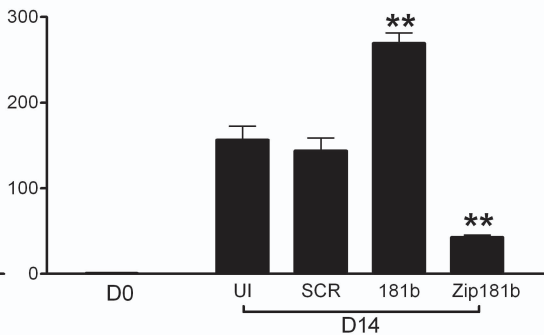

Supplement: stem0030-0643-SD2.pdf [file stem0030-0643-SD2.pdf]
