# Supplementary material for: Role of MicroRNAs 99b, 181a, and 181b in the Differentiation of Human Embryonic Stem Cells to Vascular Endothelial Cells
Source: PubMed Central journal article supplement (PMC3490385; doi:10.1002/stem.1026), 2012-01-09
Supplement: stem0030-0643-SD4.pdf [file stem0030-0643-SD4.pdf]

**Supplementary Table 1**

PremiR sequences.

| <b>miRNA</b>    | <b>5' – 3'</b>                                                                                                                                                         | <b>3' – 5'</b>                                                                                                                                                          |
|-----------------|------------------------------------------------------------------------------------------------------------------------------------------------------------------------|-------------------------------------------------------------------------------------------------------------------------------------------------------------------------|
| <b>miR-99b</b>  | AAGCTTGGATCCACCATGGGGCACCCACCCGTAGAACCG<br>ACCTTGCGGGGCCTTCGCCGCACACAAGCTCGTGTCTGT<br>GGGTCCGTGTC TAG TTTTTT CTCGAG GATATC                                             | TTCGAACCTAGGTGGTACCCCGTGGGTGGGCATCTTGG<br>CTGGAACGCCCCGGAAGCGGCCTGTGTTTCGAGCACAGA<br>CACCCAGGCACAG ATC AAAAAA GAGCTC CTATAG                                             |
| <b>miR-181a</b> | AAGCTTGGATCCACCATGGAGAAGGGCTATCAGGCCAGC<br>CTTCAGAGGACTCCAAGGAACATTCAACGCTGTCGGTGAG<br>TTTGGGATTTGAAAAAACCACTGACCGTTGACTGTACCTT<br>GGGTCCTTA TAG TTTTTT CTCGAG GATATC  | TTCGAACCTAGGTGGTACCTCTTCCCGATAGTCCGGTCG<br>GAAGTCTCCTGAGGTTCCCTTGTAAGTTGCGACAGCCACT<br>CAAACCCTAAACTTTTTTGGTGACTGGCAACTGACATGG<br>AACCCAGGAAT ATC AAAAAA GAGCTC CTATAG  |
| <b>miR-181b</b> | AAGCTTGGATCCACCATGGCCTGTGCAGAGATTATTTTTTA<br>AAAGGTCACAATCAACATTCATTGCTGTCGGTGGGTTGAA<br>CTGTGTGGACAAGCTCACTGAACAATGAATGCAACTGTGG<br>CCCCGCTT TAG TTTTTT CTCGAG GATATC | TTCGAACCTAGGTGGTACCGGACACGTCTCTAATAAAAA<br>ATTTTCCAGTGTTAGTTGTAAGTAACGACAGCCACCCAA<br>CTTGACACACCTGTTTCGAGTGACTTGTTACTTACGTTGAC<br>ACCGGGGCGAA ATC AAAAAA GAGCTC CTATAG |
